# Supplementary material for: Tumor‐infiltrating immune cell score as an independent prognostic predictor for endometrial carcinoma: Insights from a comprehensive analysis of the immune landscape
Source: PubMed Central journal article supplement (PMC10809205; doi:10.1002/cnr2.1939), 2023-11-28
Supplement: CNR2-7-e1939-s001.pdf [file CNR2-7-e1939-s001.pdf]

Supplementary **Table S1**. Cox regression analysis for 22 immune cells

| Features                     | Hazard Ratio | lower.95%CI | upper.95%CI | <i>P</i> value |
|------------------------------|--------------|-------------|-------------|----------------|
| B.cells.naive                | 12.59        | 0.01        | 12761.87    | 0.473          |
| B.cells.memory               | 0.00         | 0.00        | 4.48e10     | 0.451          |
| Plasma.cells                 | 1.62         | 0.00        | 59488.54    | 0.928          |
| T.cells.CD8                  | 0.05         | 0.00        | 0.68        | 0.025          |
| T.cells.CD4.naive            | 0.00         | 0.00        | Inf         | 0.996          |
| T.cells.CD4.memory.resting   | 31.43        | 1.95        | 507.23      | 0.015          |
| T.cells.CD4.memory.activated | 0.00         | 0.00        | 1.16        | 0.056          |
| T.cells.follicular.helper    | 0.02         | 0.00        | 52.36       | 0.327          |
| T.cells.regulatory..Tregs.   | 0.01         | 0.00        | 16.44       | 0.222          |
| T.cells.gamma.delta          | 0.76         | 0.00        | 981573.74   | 0.970          |
| NK.cells.resting             | 4.04         | 0.00        | 4630.51     | 0.698          |
| NK.cells.activated           | 0.00         | 0.00        | 0.38        | 0.026          |
| Monocytes                    | 10142.77     | 0.00        | 1.05e12     | 0.327          |
| Macrophages.M0               | 1.25         | 0.13        | 11.53       | 0.845          |
| Macrophages.M1               | 4.20         | 0.00        | 8522.07     | 0.712          |
| Macrophages.M2               | 117.68       | 0.76        | 18196.46    | 0.064          |
| Dendritic.cells.resting      | 32.11        | 0.00        | 1.35e8      | 0.656          |
| Dendritic.cells.activated    | 975.08       | 6.08        | 156297.00   | 0.008          |
| Mast.cells.resting           | 2141.43      | 0.13        | 3.59e7      | 0.122          |
| Mast.cells.activated         | 1.00         | 0.00        | 217.79      | 0.999          |
| Eosinophils                  | 5407.64      | 0.00        | 6.30e16     | 0.576          |
| Neutrophils                  | 0.00         | 0.00        | 4381370.34  | 0.467          |

Note: CI, confidence interval. The cox regression analysis for each immune cell was adjusted by traditional prognostic factors including age, tumor stage and grade.

Supplementary **Figure S1**. Survival analysis of the raw scores by four immune cells

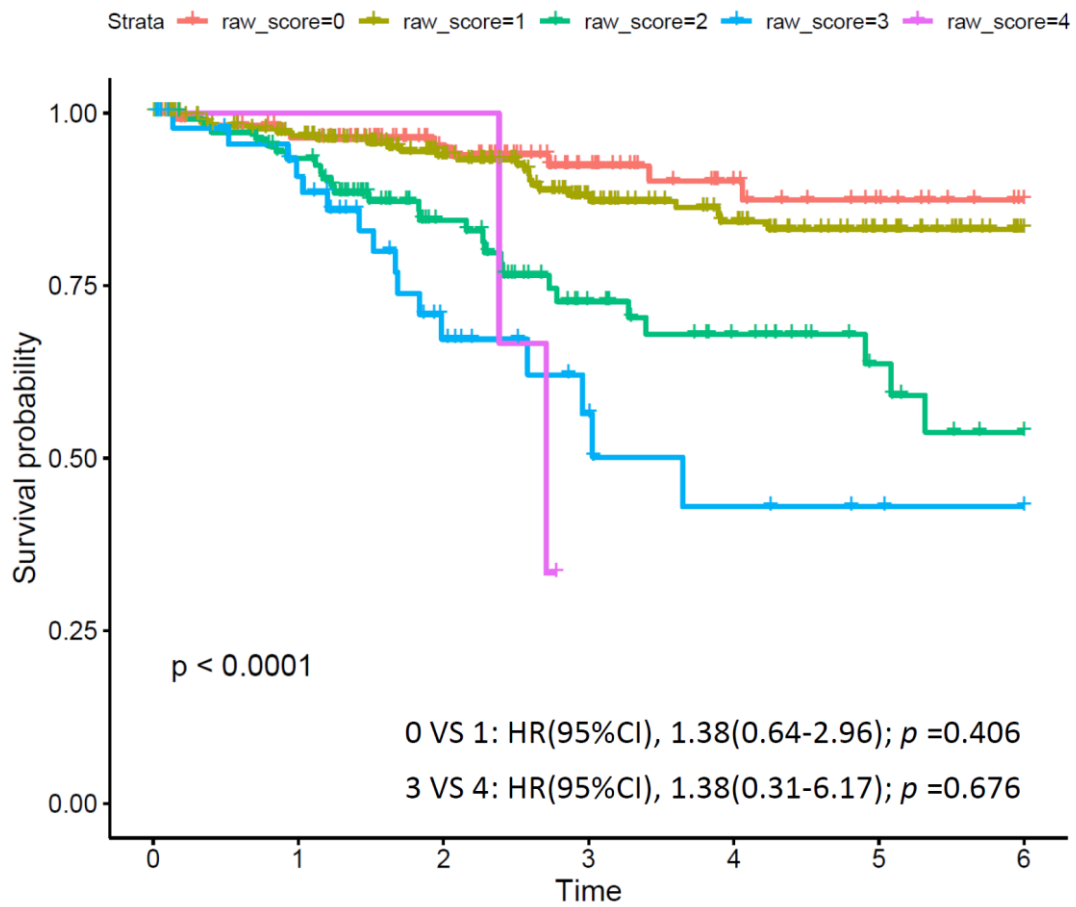

Figure S1. Survival analysis of the raw scores by four immune cells. Kaplan-Meier curves were used to compare the OS rates of different TICS subgroups, and  $p$  values were calculated by the log-rank test. Cox regression analysis was conducted to compare the difference between group 0 and group 1, and group 3 and group 4.
